# Supplementary material for: Integrating Large Language Models into Qualitative Methods in Health Services Research: A Proof-of-Concept Study
Source: Research Square preprint supplement (doi:10.21203/rs.3.rs-9726844/v1), 2026-05-28
Supplement: Supplementary file 1 [file 0050f85386a625d6475a34c3.docx]

**NLP Methods Tested**

Several methods were tested and underwent an initial evaluation for viability by the co-authors. NLP methods were identified from literature review, including methods that have been used for decades such as LDA topic modeling, to novel and cutting-edge techniques like Retrieval Augment Generation (RAG). It was decided that for a first step proof-of-concept, we wanted to focus on a technique that produced credible deductive coding, rather than an iterative, inductive approach or a method that produced something more similar to downstream analysis results. Another reason we wanted to develop a method for coding was that this is typically the most time-consuming phase of the qualitative analysis process and could also be evaluated against traditional coding methods by comparing coding reliability between human coders and the developed method. However, we recognize that the developed method may potentially yield credible coding results that differ from the coding completed by human coders and may in fact be equally fruitful or even yield results that traditional coding could miss.

Initial testing showed that passing a full transcript to the LLM alongside the complete codebook yielded too few coded segments, likely due to output window constraints that limited how much the model could return. Passing one code at a time with the full transcript improved coverage, but still coded excerpts were often too short, and the model frequently coded interviewer questions rather than participant responses. Neither approach approximated the human coding goal of coding the entire transcript and treating all text as potentially relevant. This indicated that a segmentation step was necessary to process transcripts in smaller, meaningful units before applying the codebook.

Prior approaches to segmenting long texts for LLM-assisted coding have relied on paragraph boundaries [6], or fixed character windows [29]. We found that for our data, paragraph-level segmentation did not always align with topic changes due to the non-linear nature of the conversations. A fixed-window approach had the same limitations as the whole transcript method we tested. Manual segmentation, for example during transcription, may be a viable option but reintroduces a time and cost burden. Semantic shift segmentation addresses these limitations by identifying moments where the topic of the conversation changes using embedding-based similarity to detect shifts in meaning rather than relying on formatting or length-based segmentation [36]. This approach was originally developed for topic segmentation of multi-party meeting transcripts. In interview transcripts, this aligns with how humans may code different segments according to when a participant moves from one idea to another. This segmentation produces chunks of text that are coherent enough to stand alone while remaining short enough to avoid overwhelming the LLM.
