# Supplementary material for: Integrating Large Language Models into Qualitative Methods in Health Services Research: A Proof-of-Concept Study
Source: Research Square preprint supplement (doi:10.21203/rs.3.rs-9726844/v1), 2026-05-28
Supplement: Supplementary file 2 [file 05e9bd15dd16bbf4b59a35ad.docx]

**Prompt Iteration with Semantic Shift Chunks**

In our traditional coding process, 1 transcript was used for the final reliability testing, where an arbiter identified excerpts for the human coding team to apply codes to. We used this transcript to iterate on in the initial step of applying the LLM prompt to human-identified excerpts, because there was very high reliability demonstrated by the human coding team and the identified excerpts were applied by a third party. We then included an additional 4 transcripts for testing for a total of 5 transcripts (22% (5/22) of our dataset) and used the semantic shift algorithm (detailed below) to segment the transcripts into meaningful chunks, which were then assigned codes using the LLM.

We continued to iterate on the prompt at this stage, as there were chunks and codes that needed adjustment. Namely, chunks often included the complete interviewer question, and we wanted to avoid overemphasis on the interviewer question. Additionally, we included more guidance on “cueing-in” to the entities being discussed (e.g., the interviewee’s organization or the broader service network) and refined guidance for application of specific codes such as “populations of focus” and “community needs” to be more explicit. We also experimented with requesting a single code from the LLM in our prompt versus multiple codes. In general, we found that the semantic shift algorithm was creating chunks that, when compared to the human coding, typically contain 1-3 codes on average that the human coded. Ultimately, we decided to not specify the number of codes requested from the LLM. Typically, the LLM applied 2-3 codes per chunk (see Table 1), and up to 6 codes per chunk. Our finalized codebook and coding guidelines included in the prompt are included in Additional File [X].
