# Supplementary material for: Integrating Large Language Models into Qualitative Methods in Health Services Research: A Proof-of-Concept Study
Source: Research Square preprint supplement (doi:10.21203/rs.3.rs-9726844/v1), 2026-05-28
Supplement: Supplementary file 3 [file c31542f7f0dcbfed52c4cfe8.docx]

Interviewee Characteristics: Description of the interviewee and their role at the organization. Note: This code is primarily meant to capture the interviewee's introduction of themself and their relationship to the organization. Exclude detailed description of opioid-related services or activities the interviewee conducts (see Opioid Use Services code).

Example: "I am currently the director of planning, development, and implementation at Pathway Society"

Organization Characteristics (Parent Code): General information about the organization, its background, its purpose, how it works, and its services not otherwise captured by a code in the Organization Characteristics category (i.e., exclude explicit discussion of opioid use services, populations of focus, organization strengths, organization challenges, and organization resources)

Example: "It's a tiering system here. The first responder at the 911 dispatch. The calls go first to a law enforcement public safety point. Once it is determined that it is a medical emergency it's either in the same dispatch center or in a different one, and handed off to emergency medical dispatch where the call is triaged according to the medical priority dispatch system (MPDS). Its a proprietary system of triage. And based on that triage, paramedics are dispatched. There are many nuances, but for simplicity, that's the foundation part of the system. So every patient gets a paramedic assessment by firefighter paramedic and depending upon the acuity of that patient, maybe transported either with ongoing paramedic care by a transport paramedic who was contracted. In our case, medical response. Or we transport in the same paramedic ambulance at a basic support level. That's the foundation of our EMS system. And again there are many nuances but that's the fundamental part of it."

Organization Characteristics: Opioid Use Services: Description of opioid-related services or activities the interviewee or organization conducts/provides or explicitly doesn't provide (e.g., diagnostic assessment, rapid overdose response, Naloxone/NARCAN distribution programs, MOUD). Note: Capture substance use-related services that are inclusive of opioid use services even if not solely dedicated to opioid use (e.g., residential detox programs for all substances)

Examples: "there's three methadone clinics, there's four programs, so there's medication, you're talking about wanting to know methadone, Vivitrol, which is more commonly used here for alcohol, um, so that's, and we treat with medication, we have individual and group counseling as well."

"We do not do sublingual beyond the seven days of an induction and obviously that's changing quickly with the whole micro kind of ramping or whatever. There's a lot of research that shows that you don't even need to do that one week. So it's more open, but we don't maintain people on strips..."

Organization Characteristics: Populations of Focus: Information about specific populations or communities that the interviewee or their organization intentionally serves, targets, or prioritizes in their work. Note: Include any client demographic information provided, demonstrating whom the organization does/doesn't typically serve. Exclude discussion focused on organizational procedures or functions utilized with specific populations (see other Organization Characteristics codes).

Example: "The facilities, I believe, are from 12 and older. Because of a relatively newer legislation, you can have youth up until the age of 25 in this facility under certain circumstances. That doesn't mean a young person who's 24 and committed whatever they committed in the community would come to juvenile. That's not what I'm saying. Youth who came into the system as minors may very well continue until the age of 25 here… No different programming tailored for different [populations]…In terms of the demographics that are true and relevant for this environment, we have a predominantly Latino population, youth population that comes in, the majority of whom are young men."

Organization Characteristics: Organization Strengths: Features of the organization that facilitate its ability to provide needed services.

Example: "at this moment, I have staff that's competent, um, and we have, nursing staff is actually full, which is good, um, so I, I think just overall…but the staff that is here, I think is They're just, they're genuine people, you know, and I think they really, they try to provide the best service possible under the constraints we have, so I would say that's the strength."

Organization Characteristics: Organization Challenges: Challenges the organization faces in providing services, and the organization-level factors considered to be causing those challenges (e.g., lack of resources, staff capacity, etc.). Note: Exclude discussion of broader external conditions or factors that are described as hindering optimal care provision in the network more broadly (see Network Challenges).

Example: "Being one person, there is so much to do in a small agency that it's frustrating and if you can't get to things you want to get to, you do get to things you must get to. I'm not suggesting that we're not publications as a regulatory agency but, but to move forward intellectually and therefore to move forward creatively into, into policy, that's where things slow down, the creativity and the thoughtful progression of policy by looking at data, that's where it is more difficult."

Organization Characteristics: Organization Resources: External resources the organization has received to support their OUD services, such as funding and supplies. Include discussion of how and from what source(s) the organization receives these resources, and how they further distribute these resources (e.g., sub-contracting). Note: Capture all resources that are inclusive of supporting opioid use services even if not solely dedicated to opioid use programs.

Example: "the first response paramedic and all fire resources are funded by basically property tax within a given community. Transport paramedics, the revenue for that is purely from billing. There's no subsidy or other means of providing for preparedness within the transport component of EMS, it's all done through the contract providers billing and then their payer mix and all of that."

Organization Collaboration (Parent Code): General information about organization collaboration not otherwise captured by a code in the Organization Collaboration category (i.e., exclude explicit discussion of organization collaborators, collaboration procedures, collaboration barriers, and collaboration facilitators). Note: Exclude discussion of institutions or individuals who act as broader connectors or bridges among different entities within the County (see Network Characteristics codes)

Organization Collaboration: Collaborative Relationships: Names and characteristics of the organization's individual collaborators, including referral partners, and descriptions of the purpose or focus of these collaborative relationships as well as how collaboration works operationally between the organization and their collaborators

Example: "I would say one of them would be the Valley Homeless Healthcare program because we do overlap in our population. They do a backpacking program where we go out with them. You probably talk to them about this, but they do a backpacking program where they go out into encampments. So some of our staff try to go out with them and then we also give them starter packs. So when they're out and they're seeing people who need supplies, we give a starter pack. to them so they can give them something. And then there's also a brochure in there to remind them where they need to go for more supplies and that kind of thing. And sometimes, they communicate with us and they'll tell us about somebody and what they need. But VHHP was one of the early adopters of naloxone too, so we help them get set up naloxone through the state program, which is called the NDP. You probably know about that. And so they've been distributing a lot of naloxone and they've been trained and everything. They're also trained on all of our services and supplies. We go to their staff meetings and talk to them about things that they're aware of our work."

Organization Collaboration: Collaboration Barriers: Challenges that hinder effective collaboration (including communication) with collaborators

Example: "I think the challenge is always we live in a—we're in a bureaucracy. There's paperwork. There's things that have to be stamped and forms and barriers. I think that's the case with any government bureaucracy or any bureaucracy. That's a challenge. It sometimes puts up barriers that otherwise people would have what they need. I think because the county is so big, so resourced, sometimes, I don't think we're forced to collaborate or to innovate or economize in ways that we should 'cause I know you thought public health is doing similar stuff. We're doing similar stuff. The SUTS is doing similar stuff…I don't think one hand always knows what the other hand is doing. I can say that for sure. I don't know what everybody is doing. I'm sure, sometimes, that we're overlapping each other. I think we're not being as effective as we could be because we just aren't. Some of us went to go see Highland Hospital. They have a really good medication-assisted treatment program up there. There were people from ambulatory, people from homeless. Then there was somebody from substance use treat—Mira was there and [unintelligible 21:06] was there. It was great. Even we all didn't have the same understanding of each other. The county has a tendency, sometimes, to work in siloes."

Organization Collaboration: Collaboration Facilitators: Existing conditions or strategies that promote effective collaboration (including communication) with collaborators

Example: "having a track record of success. So like under [Meg O.] and and [Alex] like. We have. You know, concrete examples of great work that's been accomplished and being able to show that to people and and like literally like in front of him like. Whether it's a zoom meeting or whatever, give them images, give them data, whatever it is, it's like. Ohh wow, you all are doing this or you did this and we've got these great evaluation results. And stuff like that. That makes it much easier."

Network Characteristics (Parent Code): General information about network characteristics not otherwise captured by a code in the Network Characteristics category (i.e., exclude explicit discussion of countywide collaborative mechanisms, network connectors, communication patterns, network strengths, and network gaps)

Example: "There are 11 hospitals in the county, one is a veterans hospital. So if a patient asks to go there, we take them there but the VA isn't necessarily a part of the bigger system."

Network Characteristics: Countywide Collaborative Mechanisms: Formal or informal infrastructures, tools, and processes in place to support coordination of efforts and/or sharing of resources among entities across the County (e.g., coalition meetings, listservs, phone number directories, etc., regardless of the ownership of said mechanisms)

Example: "there are, I think, about eight entities in the network, and we work very closely with them. There are county-run meetings that we participate in. There is a monthly meeting. Now briefly suspended, but in the monthly meetings, there was a lot of information sharing."

Network Characteristics: Network Connectors: Institutions, groups, or individuals who act as connectors or bridges that link different entities within the County, including countywide referral programs. Note: Exclude explicit discussion of how the organization works with particular collaborators (see Organization Collaboration codes). Use this code for comments on connectors that exist within the broader network.

Example: "Myra, right. She's an anchor, she's a hub herself. So through her, I'm connected to the fentanyl task force, to all the court people. It feels Myra is always throwing me into the nest somewhere too. Anytime someone has any question about jail, Molly comes to do something."

Network Characteristics: Communication Patterns: Any changes in communication within the network over time, particularly with respect to COVID-19, contributors to these changes, and how these changes impact service provision within the network

Example: "Well, COVID changed everything in many ways. You couldn't refresh your coffee without being late to another teleconference call. So the communication for better or for worse was electronic and was massive during COVID. I think what that experience did open though is that people got comfortable. Like doing this, we used to have conference calls on telephones, who uses that anymore? But this kind of interaction has become common and we become a little more comfortable with doing it. And secure systems have been able to do it involving PHI with secure systems. So I think communication methods have certainly improved and evolved during the COVID era and they continue on now for efficiency. It used to be, you had to drive somewhere to go to meetings, now you can stop one conference call, change zooms and go into another one. So for better or for worse, certainly volume, if not efficiency has increased by being able to do this kind of thing. And so from COVID like this, it's morphed into communications with entities you probably wouldn't have seen before because you haven't had a multi disciplinary approach to problems and COVID helped a bit with that evolution as well."

Network Characteristics: Network Strengths: Positive attributes of the service network within the County, including features that help facilitate service provision

Example: "Resources. Meaning, like, honestly, like monetarily, we've got flexibility there. I know that that's that's one of the big things for nonprofits and stuff is they've got to really, really work to get funding. We not that we don't have to work to get funding, but it's easier for us to have some funding available even if we can't get some grants and stuff."

Network Characteristics: Network Challenges: Factors or conditions that act as barriers to optimal provision of services by the network, and any entities or services that are missing from the County or require more support to meet County needs. Note: Exclude discussion of communities that face barriers to services unless accompanied by explicit discussion of network barriers/gaps hindering optimal provision of services (see Community Needs code)

Example: "I think the single biggest thing is coordination. And this is why I'm quiet on those calls because it seems to me that there are multiple programs across multiple departments, all trying various things. And there's no single office or individuals coordinating everything. I come from a career of incident management where there is a clear structure, and you break it down into manageable components, various efforts within admission. That's one of the things that the county doesn't do well is organize. It manages to get through stuff and it does. But in this particular case, there really needs to be one office led by one person. But the office has the people that need to manage the breadth of the problem to coordinate everything across departments that will better focus efforts."

Community Needs: Information about specific populations or communities that face barriers or lack access to services within the County. Note: Exclude discussion focused on barriers faced by the organization or broader network to provide optimal services, or services/entities missing from the County (see Organization Challenges and Network Challenges codes). Also exclude discussion focused on organizational procedures or functions utilized to address the needs of specific populations or communities (see Organization Characteristics codes).

Example: "I think, yeah, the pregnant drug addicts, yeah. They, they are very sick. They are damaging their pregnancies. They are, Uh, resistant to feedback, and I, I don't, uh, I don't know that in the last 20 years I've seen a lot of them very successful, depending on how addicted they are…Well, I think they don't have cars. I don't, I'm unclear if they really have a stable place to live. I don't know that they have basic things, so we can provide great treatment, but if a person doesn't know where they're sleeping at night, you know, it's, it's really challenging. So I think there's basic poverty issues with some of these pregnant drug using patients. I think, um, I think treatment is, is available, but I, I think that they will often have multiple children, some not in their care, and I think it's It's very challenging, you know, when you have that going on. I think many of these women don't really want to parent, but, um, they don't take care of their, you know, they don't take care of themselves."

Opportunities: Discussion of any opportunities, hopes, strategies, and/or recommendations for the network, County, and/or organization moving forward. Note: Exclude discussion of current positive attributes or strengths of the organization or network that help facilitate services (see Organization Strengths and Network Strengths codes). Double-code with other codes as appropriate.

Example: "being in our division is that [Meg O.] was the suicide prevention program manager and then she worked with like leadership on like, hey, there's so much. Overlap here between suicide prevention and substance use prevention. They should be part of the same division and and marrying those programs has been great so far. And I think the same thing could happen for. Not necessarily pulling them under the same umbrella, but like just having a little bit more of like. The connectedness between like treatment services and then prevention services, where we can kind of like, help each other out."

Miscellaneous: Content deemed important to capture that does not otherwise fit within the existing coding framework (e.g., service provider experiences, perceived patient/service user experiences)
