# Supplementary material for: Integrating Large Language Models into Qualitative Methods in Health Services Research: A Proof-of-Concept Study
Source: Research Square preprint supplement (doi:10.21203/rs.3.rs-9726844/v1), 2026-05-28
Supplement: Supplementary file 4 [file cb026dd9cb765e9915854426.docx]

**Landscape of OUD Services: Interview Guide**

Note: “organization” generally referred to in the context of OUD service providers.

1. Can you introduce yourself and your role?
2. How long have you been in this role?

**General:**

1. Can you describe the services you or your organization provide to individuals who use opioids?
2. 2. Are there specific populations or communities that are a focus in your work? If so, who are they?
3. 3. Can you describe any Naloxone/NARCAN distribution programs that your organization is a part of?

**Collaboration and Communication Patterns:**

1. What are (up to) 3 other organizations in the County you collaborate with?
2. Can you describe the nature of your relationship with these organizations?
   1. How do you collaborate with them?
   2. How do you communicate with them?
3. In your experience, have there been any:
   1. Challenges or barriers to effective collaboration and communication with these organizations?
   2. Facilitators to effective collaboration and communication with these organizations?
4. To your knowledge, are there any formal or informal mechanisms in place for coordinating efforts and sharing resources among organizations in the County?
   1. If so, what are they? Can you provide an example?

**Direction of Money and Referral Flow:**

1. How does your organization secure funding and allocate resources to support your services?
2. How does your organization:
   1. receive referrals?
   2. provide referrals?

**Identification of Connectors:**

1. Can you identify any key connectors or bridge organizations that facilitate communication and collaboration between different entities within the County?
2. Are there any influential individuals who serve as connectors or bridges between organizations?

**Changes in Patterns:**

1. Have you observed any changes or shifts in communication patterns within the network over time?
2. What factors or events have contributed to these changes?
3. How do these changes in patterns impact the effectiveness of service provision within the network?

**Network Strengths/Gaps:**

1. In your opinion, what is the biggest strength of your organization as a service provider? What about the biggest strength of the service network in the County?
2. What is the biggest challenge you face in your role as a service provider?
3. In your experience, are there any gaps or needs that are not adequately addressed within the County broadly?
4. Can you identify any organizations or services that are missing from the County, or ones that require more support?
5. Are there any specific populations or communities that face barriers or lack access to services within the County?
6. How do these gaps impact the overall effectiveness of the network in supporting individuals who use opioids?
7. Finally, what are your hopes for the system in the coming years?

**Any additional thoughts that you feel are important to share?**
